# Supplementary material for: Protection against cholera from killed whole-cell oral cholera vaccines: a systematic review and meta-analysis
Source: PubMed Central journal article supplement (PMC5639147; doi:10.1016/s1473-3099(17)30359-6), 2017-10
Supplement: mmc1.pdf [file mmc1.pdf]

# THE LANCET Infectious Diseases

## Supplementary webappendix

This webappendix formed part of the original submission and has been peer reviewed. We post it as supplied by the authors.

Supplement to: Bi Q, Ferreras E, Pezzoli L, et al. Protection against cholera from killed whole-cell oral cholera vaccines: a systematic review and meta-analysis. *Lancet Infect Dis* 2016; published online July 17. [http://dx.doi.org/10.1016/S1473-3099\(17\)30359-6](http://dx.doi.org/10.1016/S1473-3099(17)30359-6).

**Members of the Global Task Force on Cholera Control (GTFCC) Oral Cholera Vaccine (OCV) Working Group:**

Agence de Médecine Préventive: Philippe Cavailler  
US Centers for Disease Control: Kashmira Date, Nandini Sreenivasan  
The Bill and Melinda Gates Foundation: Helen Matzger  
Dipika Sur (independent)  
Epicentre: Francisco Luquero, Rebecca Grais  
European Commission Humanitarian Aid and Civil Protection (ECHO): Lale Wiesner  
Gavi: Melissa Ko  
GHESKIO: Vanessa Rouzier  
Harvard University: Corey Peak  
icddr,b: Firdausi Qadri  
International Rescue Committee: Justine Landegger  
International Vaccine Institute: Julia Lynch  
Johns Hopkins University: Andrew Azman, David Sack  
Médecins Sans Frontières: Myriam Henkens, Iza Ciglenecki  
Partners in Health: Louise Ivers  
Save the Children: Emma Diggle  
Swiss Tropical and Public Health Institute: Mitchell Weiss  
Task Force for Global Health: Alan Hinman  
UNHCR: Kahindo Maina  
UNICEF: Imran Mirza, Guillermo Gimeno (Supply Division)  
University of Maryland: Myron Levine

**Table S1.** Specific searches and terms used in review.

| <b>Date of Query</b> | <b>Engine</b>           | <b>Language Restrictions</b> | <b>Date Restrictions</b> | <b>Exact Search Query</b>                                                                                                                             |
|----------------------|-------------------------|------------------------------|--------------------------|-------------------------------------------------------------------------------------------------------------------------------------------------------|
| 9-July-2016          | Pubmed                  | None                         | None                     | cholera*[Title/Abstract]<br>AND(vaccin*[Title/Abstract]) AND<br>(effect*[Title/Abstract] OR efficacy[Title/Abstract]<br>OR protect*[Title/Abstract] ) |
| 9-July-2016          | Embase                  | None                         | None                     | cholera*:ab,ti AND vaccin*:ab,ti AND<br>(efficacy:ab,ti OR effect*:ab,ti OR protect*:ab,ti)                                                           |
| 9-July-2016          | Scopus                  | None                         | None                     | TITLE-ABS(cholera*) AND TITLE-ABS(vaccin*)<br>AND TITLE-ABS(efficacy OR effect* OR<br>protect*)                                                       |
| 11-July-2016         | ISI Web of Science      | None                         | None                     | TI=(cholera* AND vaccin*) AND TS=(efficacy OR<br>effect* OR protect*)                                                                                 |
| 9-July-2016          | Cochrane Review Library | None                         | None                     | cholera* AND vaccin* AND (efficacy OR effect*<br>OR protect*)                                                                                         |

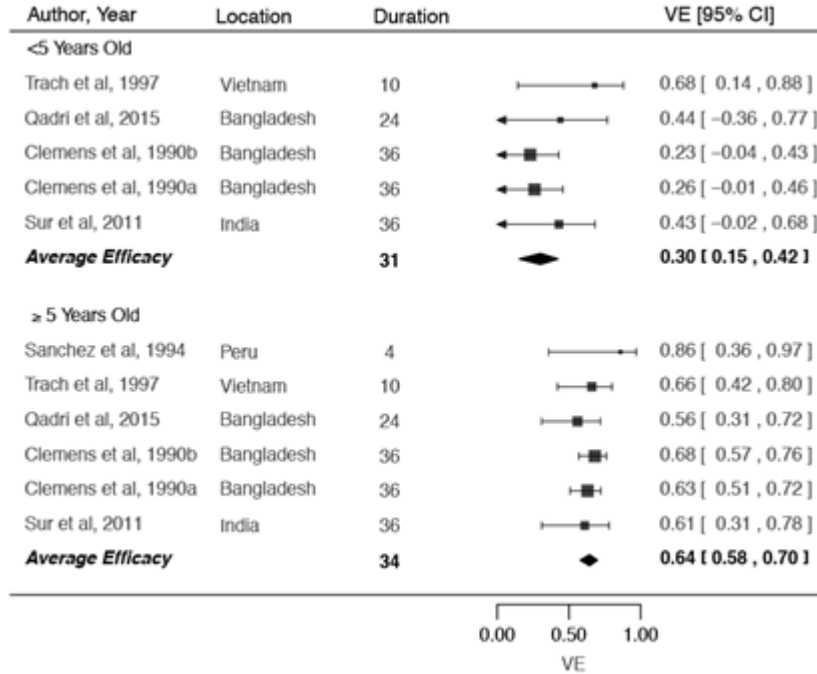

**Figure S1:** kOCV Efficacy by Age Group. Estimates of efficacy for under 5-year olds on the top and over 5-year olds (including estimates that only include 15 years and up, when 5 years and up not available). Light lines and bars represent estimates from the literature and their 95% confidence intervals. Diamonds represent average estimate and 95% confidence intervals.

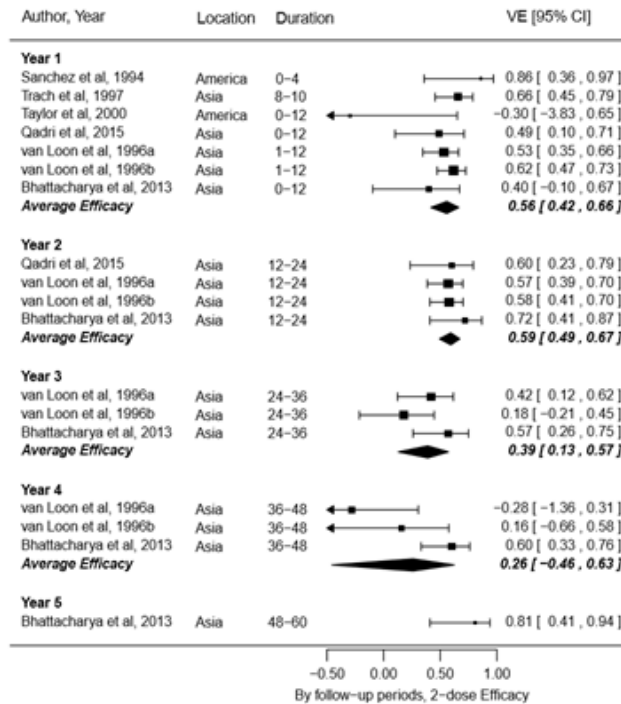

**Figure S2.** Two-dose vaccine efficacy by months since vaccination.

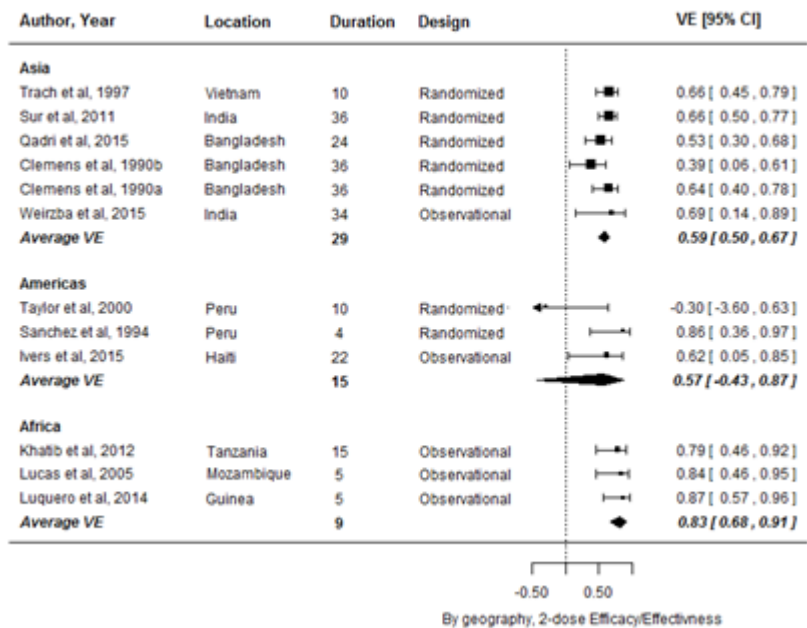

**Figure S3.** Two-dose pooled vaccine efficacy/effectiveness estimates by location of study.

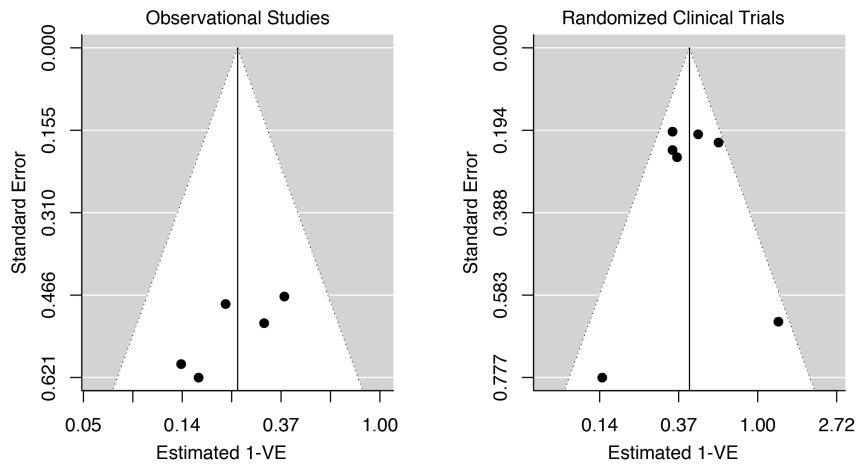

**Figure S4.** Funnel plot for assessing publication bias. Left-hand plot represents main two-dose estimates from observational studies and right hand plot is for randomized trials.

|                                                                                               | Random sequence generation (selection bias) | Allocation concealment (selection bias) | Blinding of participants and personnel (performance bias) | Blinding of outcome assessment (detection bias) | Incomplete outcome data addressed (attrition bias) | Selective reporting (reporting bias) |
|-----------------------------------------------------------------------------------------------|---------------------------------------------|-----------------------------------------|-----------------------------------------------------------|-------------------------------------------------|----------------------------------------------------|--------------------------------------|
| Bhattacharya et al 2013, Sur 2009, Sur 2011<br>(Kolkata, India)                               | +                                           | +                                       | +                                                         | +                                               | +                                                  | +                                    |
| Taylor et al 2000 (Lima, Peru)                                                                | ?                                           | +                                       | +                                                         | +                                               | ?                                                  | +                                    |
| Sanchez 1994 (Lima, Peru)                                                                     | ?                                           | ?                                       | ?                                                         | ?                                               | +                                                  | +                                    |
| Clemens 1986, Clemens 1988, Clemens 1990, Clemens<br>1992, van Loon 1996 (Matlab, Bangladesh) | ?                                           | +                                       | +                                                         | +                                               | ?                                                  | +                                    |
| Qadri et al 2015 (Dhaka, Bangladesh)                                                          | +                                           | +                                       | -                                                         | -                                               | ?                                                  | +                                    |
| Qadri et al 2016 (Dhaka, Bangladesh)                                                          | +                                           | +                                       | +                                                         | +                                               | +                                                  | +                                    |
| Trach et al 1997 (Hue, Vietnam)                                                               | ?                                           | +                                       | -                                                         | -                                               | -                                                  | +                                    |

**Figure S5.** Risk of bias summary for clinical trials following the Cochrane Collaboration Tool. Green dots represent low risk of bias, yellow indicate unclear risk of bias and red dots indicate high risk of bias.

| <b>CASE-CONTROL STUDIES</b> | <b>SELECTION<br/>MAX ****</b> | <b>COMPARABILITY<br/>MAX **</b> | <b>EXPOSURE<br/>MAX ***</b> |
|-----------------------------|-------------------------------|---------------------------------|-----------------------------|
| <b>Lucas et al, 2005</b>    | ****                          | **                              | **                          |
| <b>Luquero et al, 2012</b>  | ****                          | **                              | *                           |
| <b>Ivers et al, 2015</b>    | ****                          | **                              | **                          |
| <b>Wierzba et al, 2015</b>  | *                             | *                               | **                          |

  

| <b>COHORT STUDIES</b>     | <b>SELECTION<br/>MAX ****</b> | <b>COMPARABILITY<br/>MAX **</b> | <b>OUTCOME<br/>MAX ***</b> |
|---------------------------|-------------------------------|---------------------------------|----------------------------|
| <b>Khatib et al, 2012</b> | *                             | *                               | **                         |
| <b>Azman et al, 2016</b>  | **                            | **                              | **                         |

**Figure S6.** Risk of bias summary for observational studies. Note that we used the Cohort study tool to assess Azman et al, which was a case-cohort study as no tool for this study design exists. The maximum number of stars (indicating lowest risk of bias) is indicated next to MAX for each criterion.
